# Corticosteroid and progesterone transactivation of mineralocorticoid receptors from Amur sturgeon and tropical gar

Akira Sugimoto<sup>1</sup>, Kaori Oka<sup>1</sup>, Rui Sato<sup>1</sup>, Shinji Adachi<sup>2</sup>,  
Michael E. Baker<sup>3,\*</sup>, Yoshinao Katsu<sup>1,4,\*</sup>

<sup>1</sup>Graduate School of Life Science, Hokkaido University, Sapporo, Japan; <sup>2</sup>Faculty of Fisheries Sciences, Hokkaido University, Hakodate, Japan; <sup>3</sup>Department of Medicine, University of California, San Diego, CA, USA; <sup>4</sup>Department of Biological Sciences, Hokkaido University, Sapporo, Japan

\*Corresponding author:

Michael E. Baker: mbaker@ucsd.edu

Yoshinao Katsu: ykatsu@sci.hokudai.ac.jp

## Abstract

We investigated the response to a panel of steroids by the mineralocorticoid receptor (MR) in Amur sturgeon and tropical gar, two basal ray-finned fish, whose ancestors evolved before zebrafish and other teleosts. Half-maximal responses (EC50s) for transcriptional activation of sturgeon MR by 11-deoxycorticosterone, corticosterone, 11-deoxycortisol, cortisol and aldosterone, and progesterone were between 13 pM and 150 pM. For gar MR, EC50s were between 8 pM and 55 pM. Such low EC50s support physiological regulation by these steroids of the MR in sturgeon and gar. Companion studies with human MR and zebrafish MR found higher EC50s compared to EC50s for sturgeon and gar MR, with EC50s for zebrafish MR closer to gar and sturgeon MR than was human MR. For zebrafish MR, EC50s were between 75 pM and 740 pM; for human MR, EC50s were between 65 pM and 2 nM. Unexpectedly, progesterone was an agonist for all three fish MRs, in contrast to its antagonist activity for human MR, which is hypothesized to involve serine-810 in human MR. Indeed, progesterone is an agonist for human Ser810Leu-MR. Paradoxically, sturgeon, gar and zebrafish MRs contain a serine corresponding to serine-810 in human MR. Our data suggests alternative mechanism(s) for progesterone as an MR agonist in these three ray-finned fishes and the need for caution in applying data for progesterone signaling in zebrafish to human physiology.

# 1 INTRODUCTION

2       The mineralocorticoid receptor (MR) is a transcription factor that belongs to the  
3 nuclear receptor family, a diverse group of transcription factors that also includes  
4 receptors for androgens (AR), estrogens (ER), glucocorticoids (GR) and progestins (PR),  
5 and other small lipophilic ligands, such as thyroid hormone and retinoids [1-5]. The  
6 MR and GR are descended from a common corticosteroid receptor (CR), which has  
7 descendants in jawless fish, such as lampreys and hagfish [5-7]. Several  
8 corticosteroids (Figure 1), including aldosterone (Aldo), cortisol (F), 11-deoxycortisol  
9 (S), corticosterone (B) and 11-deoxycorticosterone (DOC), as well as progesterone  
10 (Prog), are transcriptional activators of Atlantic sea lamprey CR and hagfish CR [6].  
11 Among these steroids, Aldo, the main physiological activator of the MR in human and  
12 other terrestrial vertebrates [8-11], had the lowest half-maximal response (EC50) for  
13 transcriptional activation of the CR. This strong response to Aldo is surprising  
14 because Aldo is not found in either lamprey or hagfish serum [6]. S, which along with  
15 DOC is present in Atlantic sea lamprey serum, has been found to have  
16 mineralocorticoid activity in lamprey [12, 13].

17       Distinct MR and GR genes first appear in cartilaginous fishes (Chondrichthyes),  
18 such as sharks, rays and skates [6, 14]. Carroll et al. [14] determined EC50s of several  
19 corticosteroids for skate MR; EC50s were 70 pM for Aldo, 30 pM for DOC, 90 pM for  
20 B, 1 nM for F and 22 nM for S. In teleosts, which comprise about 95% of known  
21 ray-fish species (*Actinopterygii*), corticosteroid activation of the MR has been  
22 investigated for cichlid [15], trout [16], carp [17], midshipman fish [18] and zebrafish  
23 [19], with Aldo, F and DOC being the principal steroids that were studied. Although  
24 Aldo has not been found in teleost fish [20], Aldo has a low EC50 for teleost MRs,  
25 similar to that found for Aldo activation of lamprey CR and skate MR. DOC also has  
26 a low EC50 for teleost MRs, and DOC has been proposed as mineralocorticoid in fish  
27 [16, 21-25]. F also has been proposed to be ligand for teleost fish MR [22, 24, 25].  
28 The response of the teleost MRs to B and S, which are found in fish [25, 26], has been  
29 studied only in trout, in which the EC50s are 10 nM for B and 3.7 nM for S [16].  
30 Together, these studies indicate that several corticosteroid(s) are potential  
31 transcriptional activators of teleost MRs [22, 25, 27, 28].

32       An important gap in our understanding of the evolution of selectivity of  
33 ray-finned fish MRs for steroids is the absence of data on the MR in Chondrostei  
34 (sturgeons, paddlefishes, reedfishes, bichirs) and Holostei (bowfins, gars), which  
35 evolved before a fish-specific genome duplication occurred after the split of the  
36 Acipenseriformes (sturgeons) and the Semionotiformes (gars) from the lineage leading

1 to teleost fish, but before the divergence of Osteoglossomorpha (trout, medaka, tilapia,  
2 carp, zebrafish) (Figure 2) [29-31].  
3

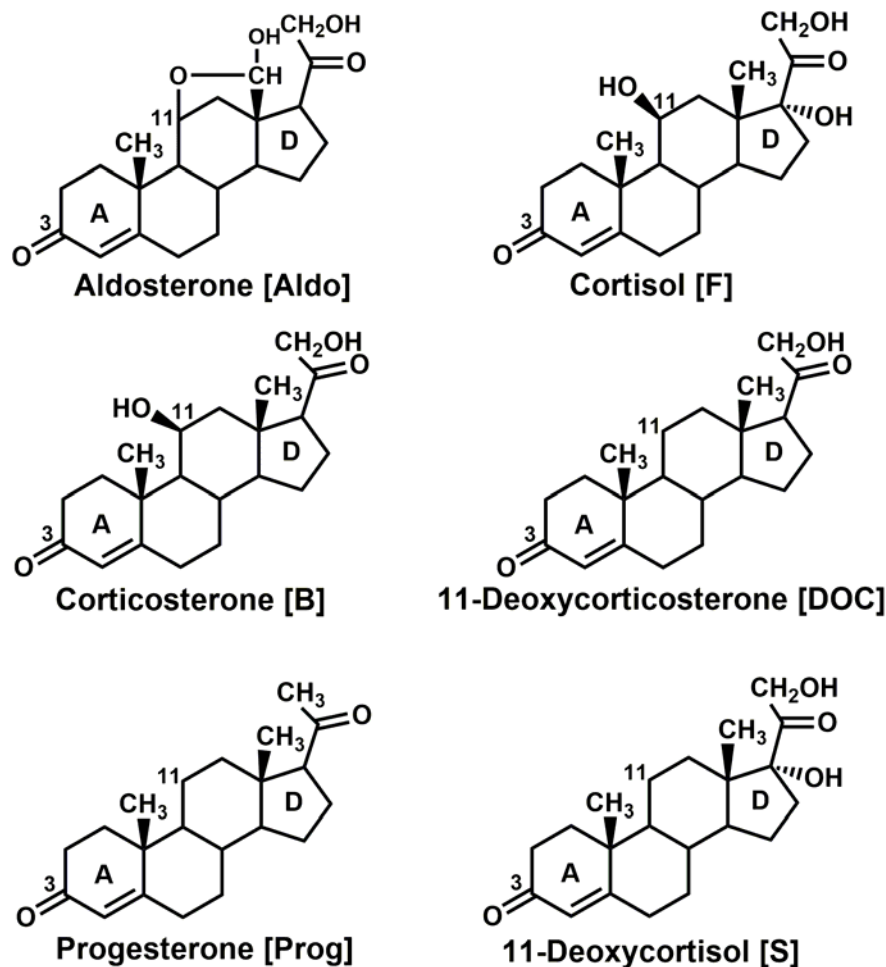

4

5

6 **Figure 1. Structures of potential steroid regulators of fish MR.**

7 Aldo, the physiological ligand for terrestrial vertebrate MRs, is not found in fish [20]. F and

8 DOC have been proposed to be mineralocorticoids in teleosts [22, 25]. S is a ligand for

9 corticosteroid receptor in lamprey [12]. Progesterone is an antagonist for human MR [32].

10

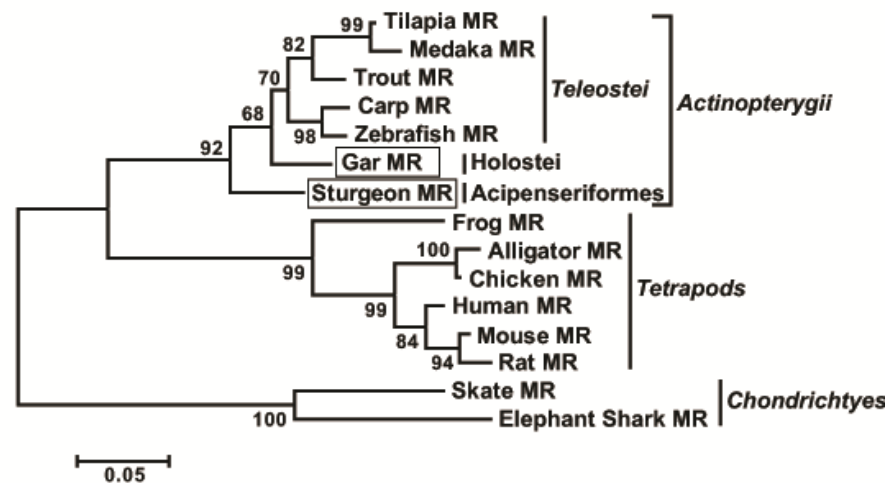

**Figure 2. Phylogenetic relationship of sturgeon and gar MRs to other vertebrates.**

To investigate the relationship of sturgeon and gar to other fish, we constructed a phylogenetic tree of the steroid-binding domains on MRs in sturgeon, gar, selected teleosts, elasmobranchs and tetrapods. The phylogenetic tree was constructed using the maximum likelihood with JTT+G model with 1000 bootstrap replications, which are shown as percentages at the nodes of the tree.

Our interest in the evolution of steroid hormone action [4, 5, 33] prompted us to investigate transcriptional activation of the MR from Amur sturgeon, *Acipenser schrenckii*, and tropical gar, *Atractosteus tropicus* by a broad panel of corticosteroids (Aldo, F, B, DOC, S) and Prog, a steroid that has not previously been studied for activation of fish MR. To gain further insight into the evolution of steroid specificity teleost and in tetrapod MRs, we compared our results with companion studies of zebrafish and human MRs. In agreement with studies of teleost MRs, we find that Aldo and DOC have the lowest EC<sub>50</sub> (highest activity) for sturgeon and gar MRs. However, we also find that S, B, F, and Prog have low EC<sub>50</sub>s, consistent with these steroids also having a physiological role as ligands for these MRs. In comparison, zebrafish MR also has a strong response to Aldo and DOC and a good response to B, F, S and Prog, while human MR has strong response to Aldo, DOC and B and a good response to F and S, and a weak response to Prog. The weak response to Prog of human MR is in agreement with other studies [32, 34, 35]. Indeed, the strong response to Prog of sturgeon, gar and zebrafish MR was unexpected because the basis for the low response to prog by human MR is thought to be due to the presence of Ser-810 on  $\alpha$ -helix 5 [32, 36, 37]. Prog is an agonist for human MR with Ser810Leu mutation [32, 36, 37]. Sturgeon, gar and zebrafish MRs contain a serine corresponding to serine-810 in human MR, suggesting the presence of an alternative mechanism

for Prog acting as an MR agonist in these three ray-finned fishes, as well as the need to apply caution in interpreting data on Prog activity in zebrafish to human physiology.

## **MATERIALS AND METHODS**

### **Animals and chemical reagents**

Amur sturgeon and tropical gar were obtained as described previously [31]. All experimental procedures involving live fish followed the policies and guidelines of the Hokkaido University Animal Care and Use Committee. Aldosterone (Aldo), corticosterone (B), cortisol (F), 11-deoxycortisol (S), 11-deoxycorticosterone (DOC), progesterone (Prog), 5 $\alpha$ -dihydrotestosterone (DHT), and 17 $\beta$ -estradiol (E2) were purchased from Sigma-Aldrich. For the reporter gene assays, all hormones were dissolved in dimethyl-sulfoxide (DMSO) and the final concentration of DMSO in the culture medium did not exceed 0.1%.

### **Molecular cloning of mineralocorticoid receptors**

Two conserved amino acid regions, GCHYGV and LYFAPD of vertebrate MRs were selected and degenerate oligonucleotides were used as primers for PCR. First-strand cDNA was synthesized from 2  $\mu$ g of total RNA isolated from the liver after amplification, and an additional primer set (CKVFFK and LYFAPD) was used for the second PCR. The amplified DNA fragments were subcloned with TA-cloning plasmid pGEM-T Easy vector, sequenced using a BigDye terminator Cycle Sequencing-kit with T7 and SP6 primers, and analyzed on the 3130 Genetic Analyzer (Applied Biosystems). The 5'- and 3'-ends of the mineralocorticoid receptor cDNAs were amplified by rapid amplification of the cDNA end (RACE) using a SMART RACE cDNA Amplification kit.

### **Database and sequence analysis**

MRs for phylogenetic analysis were collected with Blast searches of GenBank. A phylogenetic tree for MRs was constructed by the Neighbor-Joining Method [38] after sequences were aligned by MUSCLE [39] using several fish, frog, alligator, chicken, rat, mouse, human MRs. Maximum likelihood (ML) analysis was conducted using the JTT+G model. Statistical confidence for each branch in the tree was evaluated by the bootstrap method [40] with 1000 replications. We used the MEGA5 program [41] for these analyses.

### **Construction of plasmid vectors**

Full-coding regions of mineralocorticoid receptors were amplified by PCR with KOD DNA polymerase. PCR products were gel-purified and ligated into pcDNA3.1 vector. Mouse mammary tumor virus-long terminal repeat (MMTV-LTR) was amplified from pMSG vector by

PCR, and inserted into pGL3-basic vector containing the *Photinus pyralis* luciferase gene. All constructs were verified by sequencing.

### Transactivation Assay

Human embryonic kidney 293 (HEK293) cells were used in the reporter gene assay. Transfection and reporter assays were carried out as described previously [33], except that we used PEI-max as transfection reagent [42]. All transfections were performed at least three times, employing triplicate sample points in each experiment. The values shown are mean  $\pm$  SEM from three separate experiments, and dose-response data and EC50 were analyzed using GraphPad Prism.

### Statistical methods

Results are presented as mean  $\pm$  SE (SEM) from three separate experiments. All multi-group comparisons were performed using one-way ANOVA followed by Bonferroni test. Dose-response data and EC50 were analyzed using GraphPad Prism.  $P < 0.05$  was considered statistically significant.

## RESULTS

### Isolation of mineralocorticoid receptors from sturgeon and gar

We cloned sturgeon MR cDNA containing an open reading frame encoding 953 amino acids (GenBank accession LC149818), and gar MR cDNA containing an open reading frame encoding 987 amino acids (GenBank accession LC149819). Sturgeon and gar MR sequences can be divided into four domains (Figure 3). The overall amino acid identity between these two MRs was 72%, with particularly high sequence identities for the DBD (100%) and LBD (89%) (Figure 3). Comparison of sturgeon MR with five other species (human, chicken, alligator, *Xenopus*, and zebrafish) revealed that sturgeon MR had identities of 44-36% in A/B domains, 100-95% in DBDs, 67-47% in D domains, and 90-74% in LBDs (Figure 3).

### Phylogenetic analysis of ancient fish corticoid receptors

To investigate the evolutionary position of gar and sturgeon MR in relationship to other fish MRs and tetrapods, we collected MR sequences from several teleosts, skates and elephant shark and selected terrestrial vertebrates. Consistent with the evolution of Acipenseriformes and Holostei, phylogenetic analysis places sturgeon and gar MRs close to the base of ray-finned fish (Figure 2).

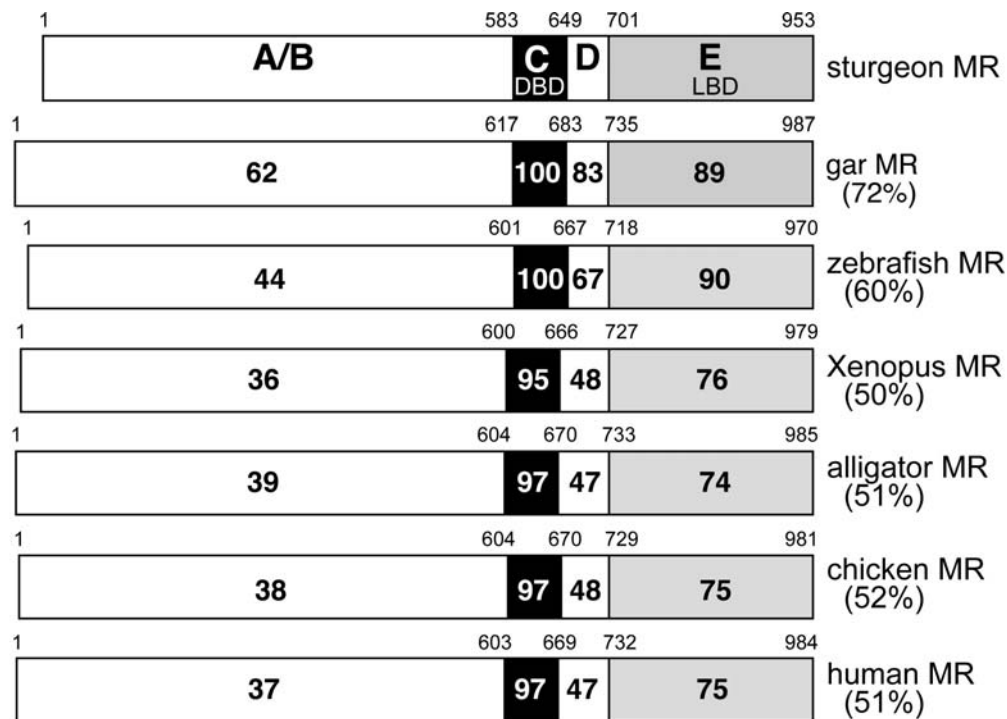

**Figure 3. Comparisons of functional domains in sturgeon, gar, zebrafish, *X. laevis*, alligator, chicken and human MRs.**

Comparison of the domains in sturgeon MR gar, zebrafish, *X. laevis*, alligator, and human MR. The functional A/B domain, C domain, D domain and E domain are schematically represented with the numbers of amino acid residues at each domain boundary indicated. The percentage of amino acid identity between domains is depicted. GenBank accession numbers are: LC149818 for sturgeon MR; LC149819 for gar MR; NM\_001100403 for zebrafish MR; NM\_001090605 for *Xenopus* MR; AB701406 for alligator MR; and NM\_000901 for human MR.

### **Strong response to 3-keto-steroids by sturgeon and gar mineralocorticoid receptors**

We examined steroid-inducible transcriptional activation of gar and sturgeon MRs using MMTV-driven reporter construct [33, 43]. For comparison, we also examined transcriptional activation of human MR and zebrafish MR. At 1 nM, Aldo, B, S, DOC, F and Prog were strong inducers of luciferase activation by gar MR and sturgeon MR and by zebrafish MR, with the exception of Prog which had a lower signal. These MRs show little stimulation by 1 nM DHT and E2 (Figure 4). At 1 nM, Aldo, B, DOC were strong transcriptional activators of human MR, which was activated to a lesser extent by S, and weakly activated by Prog (Figure 4).



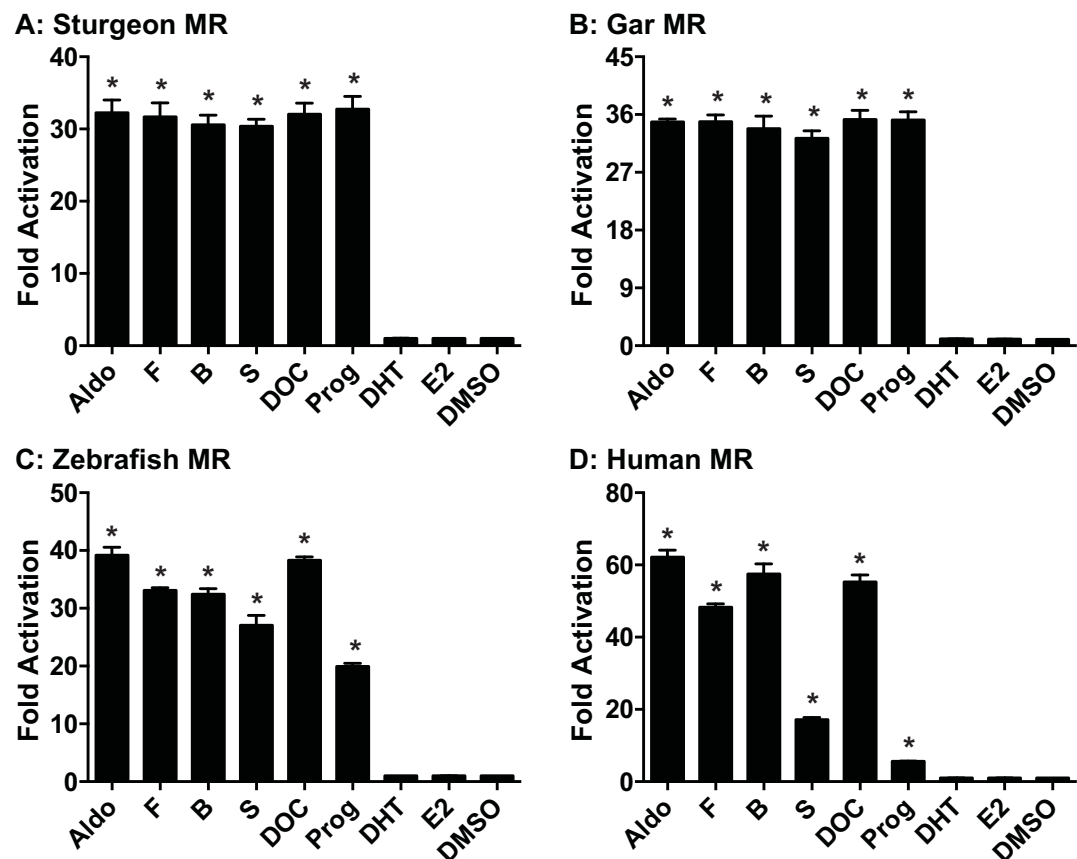

# **Steroid Concentration = 1 nM**

## **Figure 4. Ligand-specificities of fish and human MRs.**

Full-length sturgeon MR (A), gar MR (B), zebrafish (C), and human MR (D) were expressed in HEK293 cells with an MMTV-luciferase reporter. Cells were treated with  $10^{-8}$  M Aldo, F, B, S, DOC, Prog,  $5\alpha$ -dihydrotestosterone (DHT),  $17\beta$ -estradiol (E2) or vehicle alone (DMSO). Results are expressed as means  $\pm$  SEM, n=3. Y-axis indicates fold-activation compared to the activity of control vector with vehicle (DMSO) alone as 1.

We also examined concentration-dependent activation of gar, sturgeon, zebrafish, and human MRs by Aldo, F, B, DOC, S and Prog (Figure 5, Table 1). Both gar and sturgeon MRs had similar low EC<sub>50</sub>s, which varied from 7.7 pM to 150 pM for these steroids. For each steroid, the EC<sub>50</sub>s for gar MR were a little lower than for sturgeon MR.



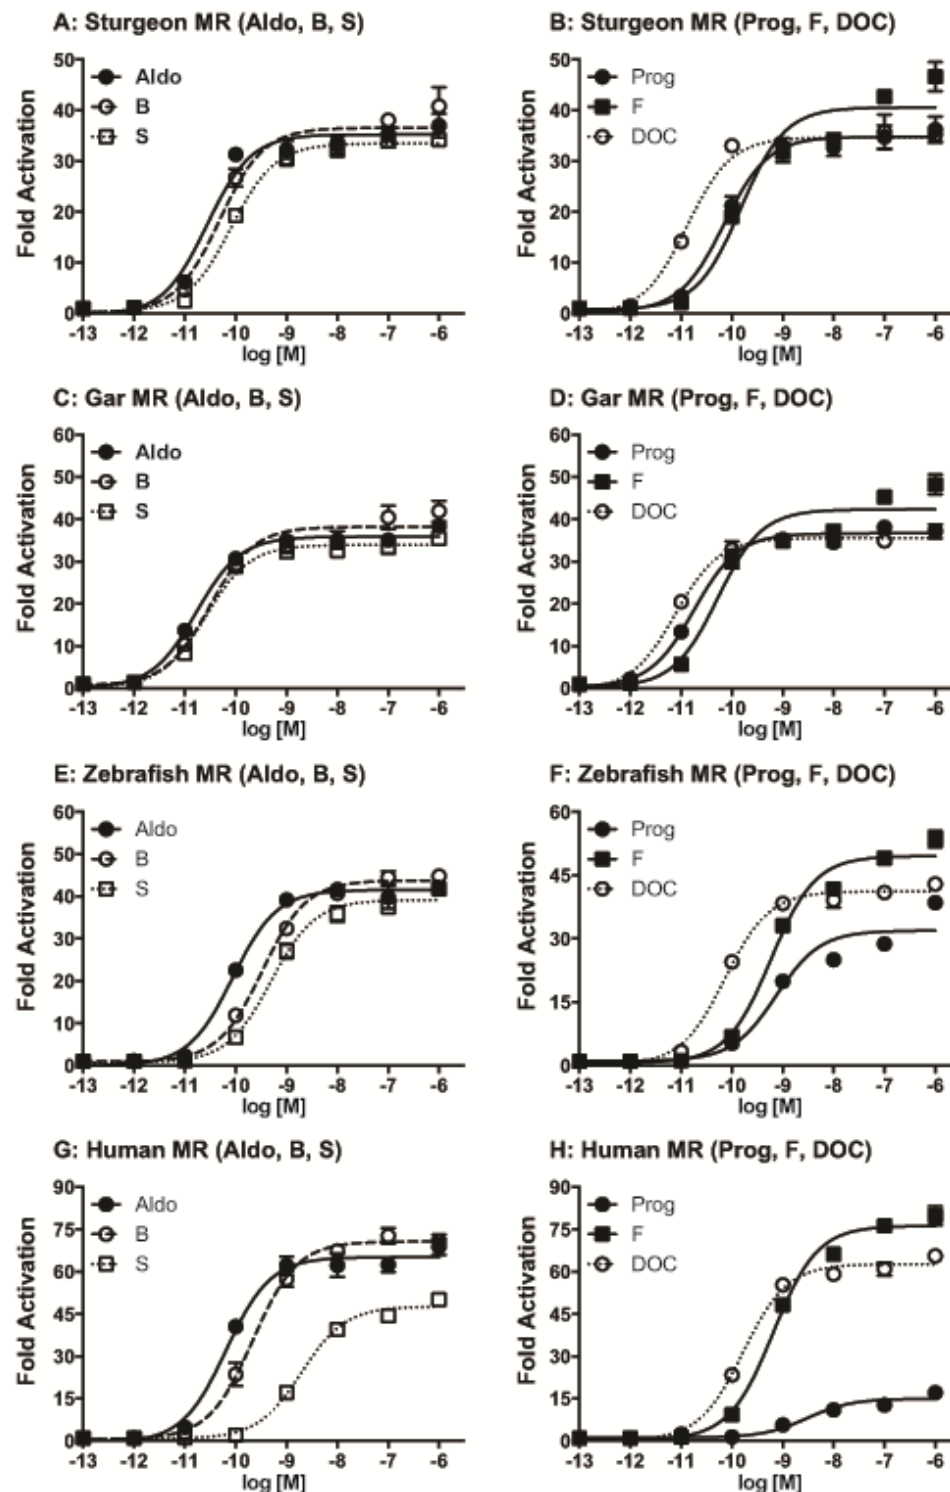

1  
2 **Figure 5. Concentration-dependent transcriptional activities of fish and human MRs.**  
3 Concentration-response profiles of full-length sturgeon MR (A and B), gar MR (C and D),  
4 zebrafish MR (E and F), and human MR (G and H) for various steroids. HEK293 cells were  
5 transiently transfected with the MMTV-containing vector together with an MR expression vector.  
6 Cells were incubated with increasing concentrations of Aldo, B, and S (A, C, E, and G) or Prog,

F, and DOC (B, D, F, and H) ( $10^{-13}$  to  $10^{-6}$ M). Data are expressed as a ratio of steroid to vehicle (DMSO). Each column represents the mean of triplicate determinations, and vertical bars represent the mean  $\pm$  SEM.

**Table 1. EC50 activities for 3-keto-steroid transcriptional activation of sturgeon, gar, zebrafish and human MRs**

|              | Aldo                  | DOC                   | B                     | S                     | F                     | Prog                  |
|--------------|-----------------------|-----------------------|-----------------------|-----------------------|-----------------------|-----------------------|
| Sturgeon MR  | $2.7 \times 10^{-11}$ | $1.3 \times 10^{-11}$ | $4.8 \times 10^{-11}$ | $8.2 \times 10^{-11}$ | $1.5 \times 10^{-10}$ | $7.0 \times 10^{-11}$ |
| Gar MR       | $1.7 \times 10^{-11}$ | $7.7 \times 10^{-12}$ | $3.1 \times 10^{-11}$ | $2.6 \times 10^{-11}$ | $5.3 \times 10^{-11}$ | $1.8 \times 10^{-11}$ |
| Zebrafish MR | $8.8 \times 10^{-11}$ | $7.4 \times 10^{-11}$ | $3.3 \times 10^{-10}$ | $5.0 \times 10^{-10}$ | $5.9 \times 10^{-10}$ | $7.4 \times 10^{-10}$ |
| Human MR     | $6.5 \times 10^{-11}$ | $1.7 \times 10^{-10}$ | $2.2 \times 10^{-10}$ | $2.0 \times 10^{-9}$  | $6.5 \times 10^{-10}$ | -                     |

In comparison, EC50s of Aldo, B and F were similar for zebrafish and human MR and a little higher than their EC50s for sturgeon and gar MR. EC50s of DOC, S and Prog for zebrafish MR were higher than their EC50s for sturgeon and gar MR, but lower than the EC50s for human MR. Prog had a lower, but still significant, maximal activation for zebrafish MR while 100 nM Prog had little activation of human MR. Overall all corticosteroids and Prog had EC50s that would be consistent with a physiological role in transcription of the MR in sturgeon, gar and zebrafish (Table 1, Figure 5).

In human MR, Ser-810 and Ala-773 are important in the low transcriptional activity of Prog. Prog can activate human MR with selective mutations at either Ser-810 or Ala-773 [32, 36, 37]. For example, at 1 nM, prog is an agonist for a Ser810Leu mutant MR [32, 36, 37]. We extracted the sequence of helices 3-5, which contain Ser-810 and Ala-773, from sturgeon, gar and zebrafish MR (Figure 6) and other teleosts [4]. All of these ray-finned fish contain a serine and alanine that aligns with Ser-810 and Ala-773 in human MR.

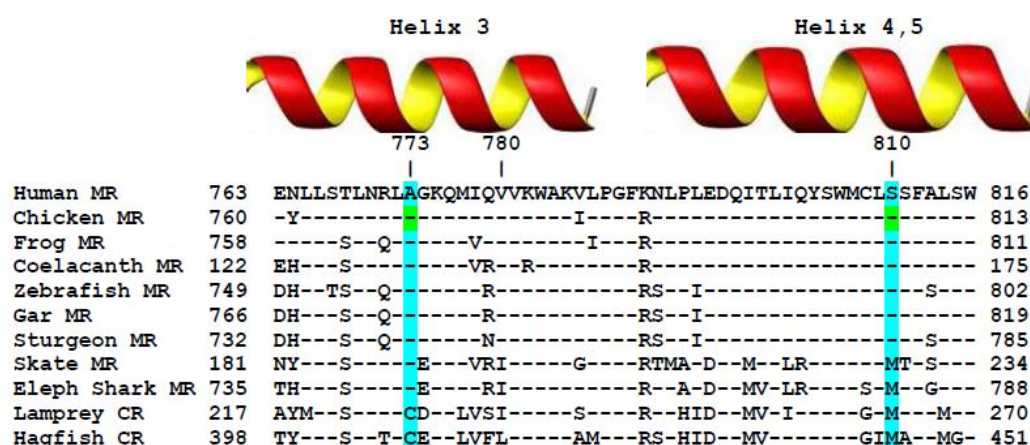

## DISCUSSION

The evolution of steroids that are transcriptional activators of the MR has been a puzzle because Aldo, the mineralocorticoid for terrestrial vertebrates first appears in lungfish [44]. Nevertheless, Aldo is a potent activator of the lamprey CR [6], which is ancestral to the MR [5-7, 11]. Interestingly, F, DOC, B and S and Prog also are transcriptional activators of the CR in lamprey and hagfish [6], with only S, thus far, found to have mineralocorticoid activity in lamprey [12, 13]. In skate, which has separate MR and GR genes, Aldo, F, DOC and B are strong transcriptional activators of the MR [14]. F, DOC, B and S are found in teleosts [26] and F and DOC have been proposed to be transcriptional activators of teleost MRs [4, 15-19, 21, 22, 24, 25].

Absent, until now, was information about the response to corticosteroids of MRs in sturgeon and gar, two basal fish that fill in the gap between elasmobranchs and teleosts (Figure 2). Here we report that sturgeon MR and gar MR have EC50s below 1 nM for Aldo, F, DOC, B, S and Prog. Interestingly, we find that zebrafish MR also has a similar strong response to these corticosteroids and Prog. This low selectivity for 3-keto-steroids (Figure 1) that can activate these fish MRs resembles the response to these steroids by lamprey and hagfish CR [6] and skate MR [14]. Thus, this strong response of the MR to a broad panel of 3-keto-steroids was conserved after the third whole-genome duplication at the base of the teleosts [29-31, 45].

In contrast, human MR is more selective for 3-keto-steroids with higher EC50s for S and Prog. Our data showing weak activation by Prog of human MR is in agreement with other studies [34-36]. The weak response of human MR to Prog combined with the high affinity of Prog for human MR explains the antagonist activity of Prog for human MR. The strong response to Prog of ray-finned fish MR is interesting in the light of the finding of Geller et al. [32] that human MR with a Ser810Leu mutation was activated by 1 nM Prog. Mutagenesis studies and structural analyses of the MR-Leu810 mutant led to the hypothesis that Leu-810 on  $\alpha$ -helix 5 has stabilizing van der Waals contacts with Ala-773 on  $\alpha$ -helix 3 [32, 36, 37], to explain the strong transcriptional activation by Prog. This serine and alanine are conserved in and sturgeon and gar MRs, as well as in zebrafish MR (Figure 6) [4] and other teleost MRs [4] indicating that other mechanism(s) can lead to a strong response of sturgeon, gar and zebrafish MR to Prog. Activation by Prog of zebrafish MR is of concern because zebrafish is an established model system for studying gene regulation in teleosts, as well as providing insights into human physiology [46]. Prog activation of zebrafish MR may confound data that focuses on activation of the PR. Prog may also be an agonist for the MR in medaka and other teleosts that have a serine and alanine that correspond to Ser-810 and Ala-773 in human MR.

### **Mechanisms for regulation of steroid activation of ray-finned fish MR**

The strong response of zebrafish MR, as well as sturgeon and gar MRs, to five

1 corticosteroids and Prog requires one or more mechanism to provide steroid-specific regulation  
 2 of transcriptional activation of these ray-finned fish MRs. At this time, such mechanisms in gar,  
 3 sturgeon and zebrafish MRs or other ray finned fish MRs are poorly understood. Clues for  
 4 possible mechanisms may be found from insights into regulation of mammalian MRs [4, 11,  
 5 47-52]. One possibility is an important mechanism in epithelial cells for regulating access of F  
 6 and B to mammalian MR by tissue specific expression of 11 $\beta$ -HSD2, which selectively converts  
 7 F and B, respectively, to cortisone (E) and 11-dehydrocortisone (A), two inactive steroids. Aldo  
 8 is inert to 11 $\beta$ -HSD2, allowing Aldo to occupy the MR in epithelial cells in which 11 $\beta$ -HSD2  
 9 inactivates F and B [11, 50, 51]. 11 $\beta$ -HSD2 is found in ray finned fish [53, 54], including  
 10 sturgeon and gar (unpublished). Expression of 11 $\beta$ -HSD2 in MR-containing tissues provides a  
 11 mechanism to exclude F and B from the MR. DOC, S and Prog, which have low EC<sub>50</sub>s in gar,  
 12 sturgeon and zebrafish, lack an 11 $\beta$ -hydroxyl group and are inert to 11 $\beta$ -HSD2.

13 Other regulatory mechanisms of the response of the MR to 3-keto-steroids include  
 14 tissue-selective synthesis of 3-keto-steroids [5, 55-57], selective sequestration of 3-keto-steroids  
 15 to plasma proteins [47, 52, 58], steroid-specific conformational changes that regulate MR  
 16 binding of co-activators [59-63], effects of inter-domain interactions between the NTD and the  
 17 LBD [19, 49, 63, 64] and post-translational modifications, such as phosphorylation, and  
 18 SUMOylation [48, 65, 66].

## 20 **Authors Contributions**

21 A.S., K.O., R.S., and S.A. carried out the research. M.E.B. and Y.K. conceived and  
 22 designed the experiments and wrote the paper. All authors gave final approval for  
 23 publication. We have no competing interests.

## 25 **Acknowledgments**

26 We thank colleagues in our laboratories. We also thank Drs. Arlette Hernandez-Franyutti and  
 27 Mari Carmen for providing gar tissues.

## 29 **Funding**

30 K.O. was supported by the Japan Society for the Promotion of Science (JSPS) Research  
 31 Fellowships for Young Scientists. This work was supported in part by Grants-in-Aid for  
 32 Scientific Research 23570067 and 26440159 (YK) from the Ministry of Education, Culture,  
 33 Sports, Science and Technology of Japan.

## 35 **References**

36 [1] Lu, N.Z., Wardell, S.E., Burnstein, K.L., Defranco, D., Fuller, P.J., Giguere, V.,

- 1 Hochberg, R.B., McKay, L., Renoir, J.M., Weigel, N.L., et al. 2006 International Union  
2 of Pharmacology. LXV. The pharmacology and classification of the nuclear receptor  
3 superfamily: glucocorticoid, mineralocorticoid, progesterone, and androgen receptors.  
4 *Pharmacological reviews* **58**, 782-797. (doi:10.1124/pr.58.4.9).
- 5 [2] Markov, G.V., Tavares, R., Dauphin-Villemant, C., Demeneix, B.A., Baker, M.E. &  
6 Laudet, V. 2009 Independent elaboration of steroid hormone signaling pathways in  
7 metazoans. *Proc Natl Acad Sci U S A* **106**, 11913-11918.  
8 (doi:10.1073/pnas.0812138106).
- 9 [3] Bridgham, J.T., Eick, G.N., Larroux, C., Deshpande, K., Harms, M.J., Gauthier,  
10 M.E., Ortlund, E.A., Degnan, B.M. & Thornton, J.W. 2010 Protein evolution by  
11 molecular tinkering: diversification of the nuclear receptor superfamily from a  
12 ligand-dependent ancestor. *PLoS biology* **8**. (doi:10.1371/journal.pbio.1000497).
- 13 [4] Baker, M.E., Funder, J.W. & Kattoula, S.R. 2013 Evolution of hormone selectivity  
14 in glucocorticoid and mineralocorticoid receptors. *J Steroid Biochem Mol Biol* **137**,  
15 57-70. (doi:10.1016/j.jsbmb.2013.07.009  
16 S0960-0760(13)00138-6 [pii]).
- 17 [5] Baker, M.E., Nelson, D.R. & Studer, R.A. 2015 Origin of the response to adrenal  
18 and sex steroids: Roles of promiscuity and co-evolution of enzymes and steroid  
19 receptors. *J Steroid Biochem Mol Biol* **151**, 12-24. (doi:10.1016/j.jsbmb.2014.10.020).
- 20 [6] Bridgham, J.T., Carroll, S.M. & Thornton, J.W. 2006 Evolution of hormone-receptor  
21 complexity by molecular exploitation. *Science* **312**, 97-101.  
22 (doi:10.1126/science.1123348).
- 23 [7] Thornton, J.W. 2001 Evolution of vertebrate steroid receptors from an ancestral  
24 estrogen receptor by ligand exploitation and serial genome expansions. *Proc Natl Acad*  
25 *Sci U S A* **98**, 5671-5676. (doi:10.1073/pnas.091553298  
26 091553298 [pii]).
- 27 [8] Funder, J.W. 2012 Aldosterone and mineralocorticoid receptors: a personal  
28 reflection. *Molecular and cellular endocrinology* **350**, 146-150.  
29 (doi:10.1016/j.mce.2011.11.026).
- 30 [9] Hawkins, U.A., Gomez-Sanchez, E.P., Gomez-Sanchez, C.M. & Gomez-Sanchez,  
31 C.E. 2012 The ubiquitous mineralocorticoid receptor: clinical implications. *Curr*  
32 *Hypertens Rep* **14**, 573-580. (doi:10.1007/s11906-012-0297-0).
- 33 [10] Martinerie, L., Munier, M., Le Menuet, D., Meduri, G., Viengchareun, S. &  
34 Lombes, M. 2013 The mineralocorticoid signaling pathway throughout development:  
35 expression, regulation and pathophysiological implications. *Biochimie* **95**, 148-157.  
36 (doi:10.1016/j.biochi.2012.09.030)



- 1 S0300-9084(12)00390-2 [pii]).
- 2 [11] Rossier, B.C., Baker, M.E. & Studer, R.A. 2015 Epithelial sodium transport and its
- 3 control by aldosterone: the story of our internal environment revisited. *Physiological*
- 4 *reviews* **95**, 297-340. (doi:10.1152/physrev.00011.2014).
- 5 [12] Close, D.A., Yun, S.S., McCormick, S.D., Wildbill, A.J. & Li, W. 2010
- 6 11-deoxycortisol is a corticosteroid hormone in the lamprey. *Proc Natl Acad Sci U S A*
- 7 **107**, 13942-13947. (doi:10.1073/pnas.0914026107).
- 8 [13] Roberts, B.W., Didier, W., Rai, S., Johnson, N.S., Libants, S., Yun, S.S. & Close,
- 9 D.A. 2014 Regulation of a putative corticosteroid,
- 10 17,21-dihydroxypregn-4-ene,3,20-one, in sea lamprey, *Petromyzon marinus*. *Gen Comp*
- 11 *Endocrinol* **196**, 17-25. (doi:10.1016/j.ygcen.2013.11.008).
- 12 [14] Carroll, S.M., Bridgham, J.T. & Thornton, J.W. 2008 Evolution of hormone
- 13 signaling in elasmobranchs by exploitation of promiscuous receptors. *Molecular*
- 14 *biology and evolution* **25**, 2643-2652. (doi:10.1093/molbev/msn204).
- 15 [15] Greenwood, A.K., Butler, P.C., White, R.B., DeMarco, U., Pearce, D. & Fernald,
- 16 R.D. 2003 Multiple corticosteroid receptors in a teleost fish: distinct sequences,
- 17 expression patterns, and transcriptional activities. *Endocrinology* **144**, 4226-4236.
- 18 (doi:10.1210/en.2003-0566
- 19 en.2003-0566 [pii]).
- 20 [16] Sturm, A., Bury, N., Dengreville, L., Fagart, J., Flouriot, G., Rafestin-Oblin, M.E.
- 21 & Prunet, P. 2005 11-deoxycorticosterone is a potent agonist of the rainbow trout
- 22 (*Oncorhynchus mykiss*) mineralocorticoid receptor. *Endocrinology* **146**, 47-55.
- 23 (doi:en.2004-0128 [pii]
- 24 10.1210/en.2004-0128).
- 25 [17] Stolte, E.H., de Mazon, A.F., Leon-Koosterziel, K.M., Jesiak, M., Bury, N.R.,
- 26 Sturm, A., Savelkoul, H.F., van Kemenade, B.M. & Flik, G. 2008 Corticosteroid
- 27 receptors involved in stress regulation in common carp, *Cyprinus carpio*. *J Endocrinol*
- 28 **198**, 403-417. (doi:10.1677/JOE-08-0100).
- 29 [18] Arterbery, A.S., Fergus, D.J., Fogarty, E.A., Mayberry, J., Deitcher, D.L., Lee
- 30 Kraus, W. & Bass, A.H. 2011 Evolution of ligand specificity in vertebrate corticosteroid
- 31 receptors. *BMC Evol Biol* **11**, 14. (doi:1471-2148-11-14 [pii]
- 32 10.1186/1471-2148-11-14).
- 33 [19] Pippal, J.B., Cheung, C.M., Yao, Y.Z., Brennan, F.E. & Fuller, P.J. 2011
- 34 Characterization of the zebrafish (*Danio rerio*) mineralocorticoid receptor. *Molecular*
- 35 *and cellular endocrinology* **332**, 58-66. (doi:S0303-7207(10)00475-2 [pii]
- 36 10.1016/j.mce.2010.09.014).

- 1 [20] Jiang, J.Q., Young, G., Kobayashi, T. & Nagahama, Y. 1998 Eel (*Anguilla japonica*)  
2 testis 11 $\beta$ -hydroxylase gene is expressed in interrenal tissue and its product lacks  
3 aldosterone synthesizing activity. *Molecular and cellular endocrinology* **146**, 207-211.
- 4 [21] Baker, M.E. 2003 Evolution of glucocorticoid and mineralocorticoid responses: go  
5 fish. *Endocrinology* **144**, 4223-4225. (doi:10.1210/en.2003-0843).
- 6 [22] Bury, N.R. & Sturm, A. 2007 Evolution of the corticosteroid receptor signalling  
7 pathway in fish. *Gen Comp Endocrinol* **153**, 47-56. (doi:S0016-6480(07)00117-7 [pii]  
8 10.1016/j.ygcen.2007.03.009).
- 9 [23] Baker, M.E., Chandsawangbhuwana, C. & Ollikainen, N. 2007 Structural analysis  
10 of the evolution of steroid specificity in the mineralocorticoid and glucocorticoid  
11 receptors. *BMC Evol Biol* **7**, 24. (doi:1471-2148-7-24 [pii]  
12 10.1186/1471-2148-7-24).
- 13 [24] Sakamoto, T., Mori, C., Minami, S., Takahashi, H., Abe, T., Ojima, D., Ogoshi, M.  
14 & Sakamoto, H. 2011 Corticosteroids stimulate the amphibious behavior in mudskipper:  
15 potential role of mineralocorticoid receptors in teleost fish. *Physiol Behav* **104**, 923-928.  
16 (doi:10.1016/j.physbeh.2011.06.002).
- 17 [25] Takahashi, H. & Sakamoto, T. 2013 The role of 'mineralocorticoids' in teleost fish:  
18 relative importance of glucocorticoid signaling in the osmoregulation and 'central'  
19 actions of mineralocorticoid receptor. *Gen Comp Endocrinol* **181**, 223-228.  
20 (doi:10.1016/j.ygcen.2012.11.016).
- 21 [26] Milla, S., Wang, N., Mandiki, S.N. & Kestemont, P. 2009 Corticosteroids: Friends  
22 or foes of teleost fish reproduction? *Comparative biochemistry and physiology. Part A,*  
23 *Molecular & integrative physiology* **153**, 242-251. (doi:10.1016/j.cbpa.2009.02.027).
- 24 [27] Gilmour, K.M. 2005 Mineralocorticoid receptors and hormones: fishing for  
25 answers. *Endocrinology* **146**, 44-46. (doi:10.1210/en.2004-1390).
- 26 [28] Prunet, P., Sturm, A. & Milla, S. 2006 Multiple corticosteroid receptors in fish:  
27 from old ideas to new concepts. *Gen Comp Endocrinol* **147**, 17-23.  
28 (doi:10.1016/j.ygcen.2006.01.015).
- 29 [29] Jaillon, O., Aury, J.M., Brunet, F., Petit, J.L., Stange-Thomann, N., Mauceli, E.,  
30 Bouneau, L., Fischer, C., Ozouf-Costaz, C., Bernot, A., et al. 2004 Genome duplication  
31 in the teleost fish *Tetraodon nigroviridis* reveals the early vertebrate proto-karyotype.  
32 *Nature* **431**, 946-957. (doi:10.1038/nature03025).
- 33 [30] Kasahara, M., Naruse, K., Sasaki, S., Nakatani, Y., Qu, W., Ahsan, B., Yamada, T.,  
34 Nagayasu, Y., Doi, K., Kasai, Y., et al. 2007 The medaka draft genome and insights into  
35 vertebrate genome evolution. *Nature* **447**, 714-719. (doi:10.1038/nature05846).
- 36 [31] Katsu, Y., Kohno, S., Hyodo, S., Ijiri, S., Adachi, S., Hara, A., Guillelte, L.J., Jr. &



- 1 Iguchi, T. 2008 Molecular cloning, characterization, and evolutionary analysis of
- 2 estrogen receptors from phylogenetically ancient fish. *Endocrinology* **149**, 6300-6310.
- 3 (doi:10.1210/en.2008-0670).
- 4 [32] Geller, D.S., Farhi, A., Pinkerton, N., Fradley, M., Moritz, M., Spitzer, A., Meinke,
- 5 G, Tsai, F.T., Sigler, P.B. & Lifton, R.P. 2000 Activating mineralocorticoid receptor
- 6 mutation in hypertension exacerbated by pregnancy. *Science* **289**, 119-123.
- 7 [33] Oka, K., Hoang, A., Okada, D., Iguchi, T., Baker, M.E. & Katsu, Y. 2015 Allosteric
- 8 role of the amino-terminal A/B domain on corticosteroid transactivation of gar and
- 9 human glucocorticoid receptors. *J Steroid Biochem Mol Biol* **154**, 112-119.
- 10 (doi:10.1016/j.jsbmb.2015.07.025).
- 11 [34] Rupprecht, R., Reul, J.M., van Steensel, B., Spengler, D., Soder, M., Berning, B.,
- 12 Holsboer, F. & Damm, K. 1993 Pharmacological and functional characterization of
- 13 human mineralocorticoid and glucocorticoid receptor ligands. *Eur J Pharmacol* **247**,
- 14 145-154.
- 15 [35] Fagart, J., Wurtz, J.M., Souque, A., Hellal-Levy, C., Moras, D. & Rafestin-Oblin,
- 16 M.E. 1998 Antagonism in the human mineralocorticoid receptor. *The EMBO journal* **17**,
- 17 3317-3325. (doi:10.1093/emboj/17.12.3317).
- 18 [36] Bledsoe, R.K., Madauss, K.P., Holt, J.A., Apolito, C.J., Lambert, M.H., Pearce,
- 19 K.H., Stanley, T.B., Stewart, E.L., Trump, R.P., Willson, T.M., et al. 2005 A
- 20 ligand-mediated hydrogen bond network required for the activation of the
- 21 mineralocorticoid receptor. *The Journal of biological chemistry* **280**, 31283-31293.
- 22 (doi:M504098200 [pii]
- 23 10.1074/jbc.M504098200).
- 24 [37] Fagart, J., Huyet, J., Pinon, G.M., Rochel, M., Mayer, C. & Rafestin-Oblin, M.E.
- 25 2005 Crystal structure of a mutant mineralocorticoid receptor responsible for
- 26 hypertension. *Nature structural & molecular biology* **12**, 554-555.
- 27 (doi:10.1038/nsmb939).
- 28 [38] Saitou, N. & Nei, M. 1987 The neighbor-joining method: a new method for
- 29 reconstructing phylogenetic trees. *Molecular biology and evolution* **4**, 406-425.
- 30 [39] Edgar, R.C. 2004 MUSCLE: multiple sequence alignment with high accuracy and
- 31 high throughput. *Nucleic acids research* **32**, 1792-1797. (doi:10.1093/nar/gkh340).
- 32 [40] Felsenstein, J. 1985 Confidence-Limits on Phylogenies - an Approach Using the
- 33 Bootstrap. *Evolution* **39**, 783-791. (doi:Doi 10.2307/2408678).
- 34 [41] Tamura, K., Peterson, D., Peterson, N., Stecher, G., Nei, M. & Kumar, S. 2011
- 35 MEGA5: molecular evolutionary genetics analysis using maximum likelihood,
- 36 evolutionary distance, and maximum parsimony methods. *Molecular biology and*

- 1 *evolution* **28**, 2731-2739. (doi:10.1093/molbev/msr121).
- 2 [42] Kadlecova, Z., Nallet, S., Hacker, D.L., Baldi, L., Klok, H.A. & Wurm, F.M. 2012
- 3 Poly(ethyleneimine)-mediated large-scale transient gene expression: influence of
- 4 molecular weight, polydispersity and N-propionyl groups. *Macromol Biosci* **12**,
- 5 628-636. (doi:10.1002/mabi.201100404).
- 6 [43] Oka, K., Kohno, S., Urushitani, H., Guillette, L.J., Jr., Ohta, Y., Iguchi, T. & Katsu,
- 7 Y. 2013 Molecular cloning and characterization of the corticoid receptors from the
- 8 American alligator. *Molecular and cellular endocrinology* **365**, 153-161.
- 9 (doi:10.1016/j.mce.2012.10.014).
- 10 [44] Joss, J.M.P., Arnoldreed, D.E. & Balment, R.J. 1994 The Steroidogenic Response
- 11 to Angiotensin-II in the Australian Lungfish, *Neoceratodus-Forsteri*. *J Comp Physiol B*
- 12 **164**, 378-382. (doi:Doi 10.1007/Bf00302553).
- 13 [45] Inoue, J., Sato, Y., Sinclair, R., Tsukamoto, K. & Nishida, M. 2015 Rapid genome
- 14 reshaping by multiple-gene loss after whole-genome duplication in teleost fish
- 15 suggested by mathematical modeling. *Proc Natl Acad Sci U S A* **112**, 14918-14923.
- 16 (doi:10.1073/pnas.1507669112).
- 17 [46] Tokarz, J., Moller, G., de Angelis, M.H. & Adamski, J. 2013 Zebrafish and steroids:
- 18 what do we know and what do we need to know? *J Steroid Biochem Mol Biol* **137**,
- 19 165-173. (doi:10.1016/j.jsbmb.2013.01.003).
- 20 [47] Funder, J. & Myles, K. 1996 Exclusion of corticosterone from epithelial
- 21 mineralocorticoid receptors is insufficient for selectivity of aldosterone action: in vivo
- 22 binding studies. *Endocrinology* **137**, 5264-5268. (doi:10.1210/endo.137.12.8940344).
- 23 [48] Pascual-Le Tallec, L. & Lombes, M. 2005 The mineralocorticoid receptor: a
- 24 journey exploring its diversity and specificity of action. *Mol Endocrinol* **19**, 2211-2221.
- 25 (doi:10.1210/me.2005-0089).
- 26 [49] Fuller, P.J., Yao, Y., Yang, J. & Young, M.J. 2012 Mechanisms of ligand specificity
- 27 of the mineralocorticoid receptor. *J Endocrinol* **213**, 15-24. (doi:JOE-11-0372 [pii]
- 28 10.1530/JOE-11-0372).
- 29 [50] Odermatt, A. & Kratschmar, D.V. 2012 Tissue-specific modulation of
- 30 mineralocorticoid receptor function by 11beta-hydroxysteroid dehydrogenases: an
- 31 overview. *Molecular and cellular endocrinology* **350**, 168-186.
- 32 (doi:10.1016/j.mce.2011.07.020).
- 33 [51] Chapman, K., Holmes, M. & Seckl, J. 2013 11beta-hydroxysteroid
- 34 dehydrogenases: intracellular gate-keepers of tissue glucocorticoid action. *Physiological*
- 35 *reviews* **93**, 1139-1206. (doi:10.1152/physrev.00020.2012).
- 36 [52] Sivukhina, E.V. & Jirikowski, G.F. 2014 Adrenal steroids in the brain: role of the

- 1 intrinsic expression of corticosteroid-binding globulin (CBG) in the stress response.
- 2 *Steroids* **81**, 70-73. (doi:10.1016/j.steroids.2013.11.001).
- 3 [53] Kusakabe, M., Nakamura, I. & Young, G. 2003 11beta-hydroxysteroid
- 4 dehydrogenase complementary deoxyribonucleic acid in rainbow trout: cloning, sites of
- 5 expression, and seasonal changes in gonads. *Endocrinology* **144**, 2534-2545.
- 6 (doi:10.1210/en.2002-220446).
- 7 [54] Baker, M.E. 2010 11Beta-hydroxysteroid dehydrogenase-type 2 evolved from an
- 8 ancestral 17beta-hydroxysteroid dehydrogenase-type 2. *Biochemical and biophysical*
- 9 *research communications* **399**, 215-220. (doi:10.1016/j.bbrc.2010.07.057).
- 10 [55] Nebert, D.W. & Russell, D.W. 2002 Clinical importance of the cytochromes P450.
- 11 *Lancet* **360**, 1155-1162. (doi:10.1016/S0140-6736(02)11203-7).
- 12 [56] Payne, A.H. & Hales, D.B. 2004 Overview of steroidogenic enzymes in the
- 13 pathway from cholesterol to active steroid hormones. *Endocr Rev* **25**, 947-970.
- 14 (doi:10.1210/er.2003-0030).
- 15 [57] Taves, M.D., Plumb, A.W., Sandkam, B.A., Ma, C., Van Der Gugten, J.G., Holmes,
- 16 D.T., Close, D.A., Abraham, N. & Soma, K.K. 2015 Steroid profiling reveals
- 17 widespread local regulation of glucocorticoid levels during mouse development.
- 18 *Endocrinology* **156**, 511-522. (doi:10.1210/en.2013-1606).
- 19 [58] Breuner, C.W. & Orchinik, M. 2002 Plasma binding proteins as mediators of
- 20 corticosteroid action in vertebrates. *J Endocrinol* **175**, 99-112.
- 21 [59] Bledsoe, R.K., Montana, V.G., Stanley, T.B., Delves, C.J., Apolito, C.J., McKee,
- 22 D.D., Consler, T.G., Parks, D.J., Stewart, E.L., Willson, T.M., et al. 2002 Crystal
- 23 structure of the glucocorticoid receptor ligand binding domain reveals a novel mode of
- 24 receptor dimerization and coactivator recognition. *Cell* **110**, 93-105.
- 25 (doi:S0092867402008176 [pii]).
- 26 [60] Li, Y., Suino, K., Daugherty, J. & Xu, H.E. 2005 Structural and biochemical
- 27 mechanisms for the specificity of hormone binding and coactivator assembly by
- 28 mineralocorticoid receptor. *Mol Cell* **19**, 367-380. (doi:S1097-2765(05)01429-2 [pii]
- 29 10.1016/j.molcel.2005.06.026).
- 30 [61] Hultman, M.L., Krasnoperova, N.V., Li, S., Du, S., Xia, C., Dietz, J.D., Lala, D.S.,
- 31 Welsch, D.J. & Hu, X. 2005 The ligand-dependent interaction of mineralocorticoid
- 32 receptor with coactivator and corepressor peptides suggests multiple activation
- 33 mechanisms. *Mol Endocrinol* **19**, 1460-1473. (doi:10.1210/me.2004-0537).
- 34 [62] Khan, S.H., Awasthi, S., Guo, C., Goswami, D., Ling, J., Griffin, P.R., Simons, S.S.,
- 35 Jr. & Kumar, R. 2012 Binding of the N-terminal region of coactivator TIF2 to the
- 36 intrinsically disordered AF1 domain of the glucocorticoid receptor is accompanied by

1 conformational reorganizations. *The Journal of biological chemistry* **287**, 44546-44560.  
2 (doi:10.1074/jbc.M112.411330).  
3 [63] Fuller, P.J. 2015 Novel interactions of the mineralocorticoid receptor. *Molecular*  
4 *and cellular endocrinology* **408**, 33-37. (doi:10.1016/j.mce.2015.01.027).  
5 [64] Pippal, J.B., Yao, Y., Rogerson, F.M. & Fuller, P.J. 2009 Structural and functional  
6 characterization of the interdomain interaction in the mineralocorticoid receptor. *Mol*  
7 *Endocrinol* **23**, 1360-1370. (doi:me.2009-0032 [pii]  
8 10.1210/me.2009-0032).  
9 [65] Bhargava, A. & Pearce, D. 2004 Mechanisms of mineralocorticoid action:  
10 determinants of receptor specificity and actions of regulated gene products. *Trends*  
11 *Endocrinol Metab* **15**, 147-153. (doi:10.1016/j.tem.2004.03.009).  
12 [66] Faresse, N. 2014 Post-translational modifications of the mineralocorticoid receptor:  
13 How to dress the receptor according to the circumstances? *J Steroid Biochem Mol Biol*  
14 **143**, 334-342. (doi:10.1016/j.jsbmb.2014.04.015).  
15  
16

# 1 **Figure Legends**

## 2 **Figure 1. Structures of potential regulators of fish MR.**

3 Aldo, the physiological ligand for terrestrial vertebrate MRs, is not found in fish [20]. B is a  
4 ligand for terrestrial vertebrate MRs. F and DOC have been proposed to be mineralocorticoids  
5 in teleosts [22, 25]. S is a ligand for corticosteroid receptor in lamprey [12, 13]. Progesterone  
6 is an antagonist for human MR [32, 34, 35].

## 8 **Figure 2. Phylogenetic relationship of sturgeon and gar MRs to other vertebrates.**

9 To investigate the relationship of sturgeon and gar to other fish, we constructed a phylogenetic  
10 tree of the steroid-binding domains on MRs in sturgeon, gar, selected teleosts, elasmobranchs  
11 and tetrapods. The phylogenetic tree was constructed using the maximum likelihood with  
12 JTT+G model with 1000 bootstrap replications, which are shown as percentages at the nodes of  
13 the tree.

## 15 **Figure 3. Comparisons of functional domains in sturgeon, gar, zebrafish, *X. laevis*, alligator, chicken and human MRs.**

17 Comparison of domains in sturgeon MR gar, zebrafish, *X. laevis*, alligator, and human MR.  
18 The functional A/B, C, D and E domains are schematically represented with the numbers of  
19 amino acid residues at each domain boundary indicated. The percentage of amino acid identity  
20 between domains is depicted. GenBank accessions are: LC149818 for sturgeon MR;  
21 LC149819 for gar MR; NM\_001100403 for zebrafish MR; NM\_001090605 for *Xenopus* MR;  
22 AB701406 for alligator MR; and NM\_000901 for human MR.

## 24 **Figure 4. Ligand-specificities of fish and human MRs.**

25 Full-length sturgeon MR (A), gar MR (B), zebrafish MR (C), and human MR (D) were  
26 expressed in HEK293 cells with an MMTV-luciferase reporter. Cells were treated with  $10^{-9}$  M  
27 Aldo, F, B, S, DOC, Prog, DHT, E2 or vehicle alone (DMSO). Results are expressed as means  
28  $\pm$  SEM, n=3. Y-axis indicates fold-activation compared to the control vector with vehicle  
29 (DMSO) alone as 1.

## 31 **Figure 5. Concentration-dependent transcriptional activities of fish and human MRs.**

32 Concentration-response profiles of full-length sturgeon MR (A, B), gar MR (C, D), zebrafish  
33 MR (E, F), and human MR (G, H) for various steroids. HEK293 cells were transiently  
34 transfected with the MMTV-containing vector together with an MR expression vector. Cells  
35 were incubated with increasing concentrations of Aldo, B, and S (A, C, E, and G) or Prog, F, and  
36 DOC (B, D, F, and H) ( $10^{-13}$  to  $10^{-6}$  M). Data are expressed as a ratio of steroid to vehicle

1 (DMSO). Each column represents the mean of triplicate determinations, and vertical bars  
2 represent the mean  $\pm$  SEM.

3

4 **Figure 6. Alignment of vertebrate MRs to Serine-810 and Alanine-773 in helices 3-5 in**  
5 **human MR.**

6 Human Ser-810 and Ala-773 are conserved in ray-finned fish MRs. Skate MR, elephant shark  
7 MR, lamprey CR and hagfish CR contain a methionine corresponding to human Ser-810.  
8 Lamprey CR and hagfish CR contain a cysteine corresponding to Ala-773 in human MR.  
9 Amino acids that are identical to amino acids in human MR are denoted by (-).
